# Supplementary material
Source: PubMed Central journal article supplement (PMC6675890)
Supplement: JVI.00110-19-s0003.pdf [file JVI.00110-19-s0003.pdf]

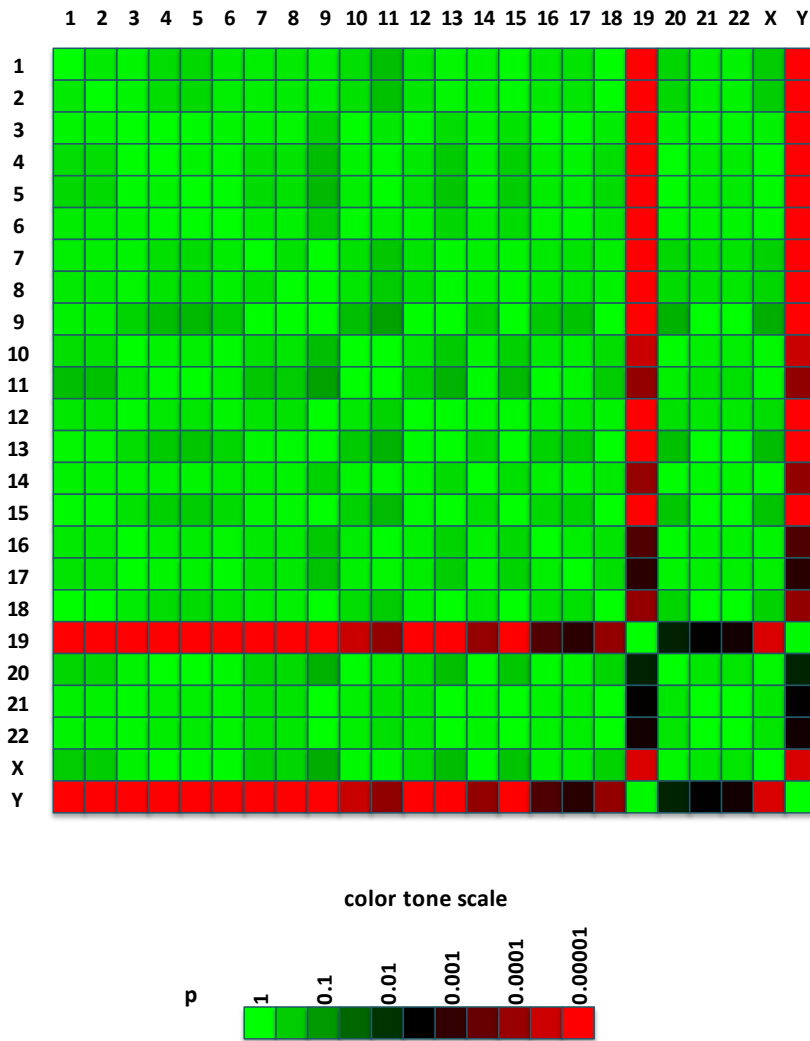

**Fig. S1. Heatmap of p values obtained from the chi-square for the difference in the frequency of HML-6 proviruses insertions calculated between each pair of chromosomes.** All p values obtained from the comparison of chromosome 19 and Y with all other chromosomes were statistically significant, with a cumulative probability of false discoveries less than 5%, as assessed by the Benjamini-Hockberg procedure. Conversely, all other comparisons were not statistically significant

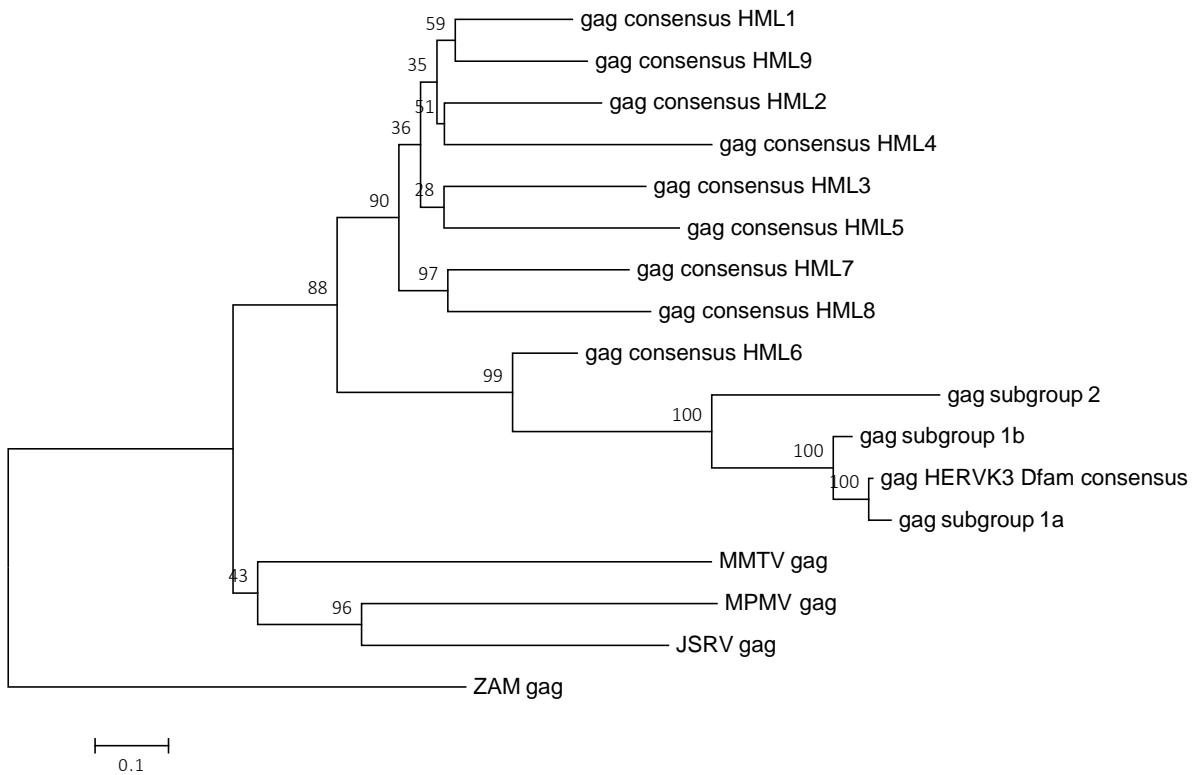

**Fig. S2. Phylogenetic tree of the HML gag consensus sequences.** The phylogeny of HML-6 group was investigated by performing a NJ analysis of amino acid sequences of gag. Our consensus sequences for the gag gene of each subgroup and the gag consensus sequences of the others HML groups are included in this tree. The gag sequences of the exogenous betaretroviruses MMTV, MPMV and JSRV, and gag sequence of ZAM, endogenous retrovirus in *drosophila* were used as out-groups. The phylogenetic tree has been built by using the Bootstrap method with 1000 replicates.

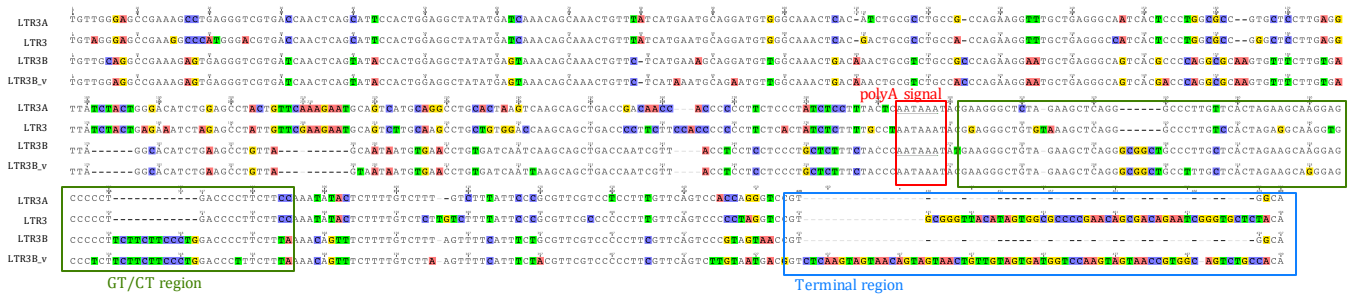

**Fig. S3. Structural characterization of HML-6 LTRs.** The alignments between the LTR3A, LTR3, LTR3B and LTR3B\_v Dfam consensus sequences are shown as two-dimensional dot plots matrices, where the sequences were compared along the vertical and horizontal axes and the similarity between them are indicated by black dots composing a diagonal lines across the matrix. In particular, the dotplots showed differences in length between LTR3A and LTR3 consensus and between LTR3B and LTR3B\_v consensus, caused by deletions in the LTR3A and LTR3B\_v a 3'-ends.

a

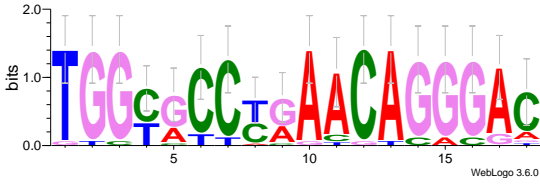

b

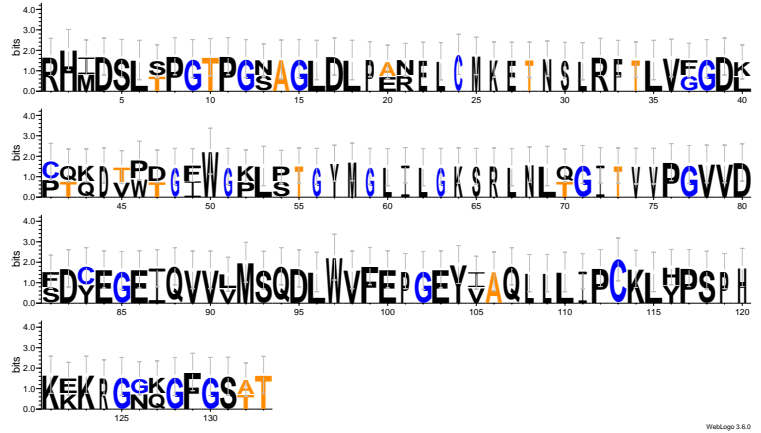

c

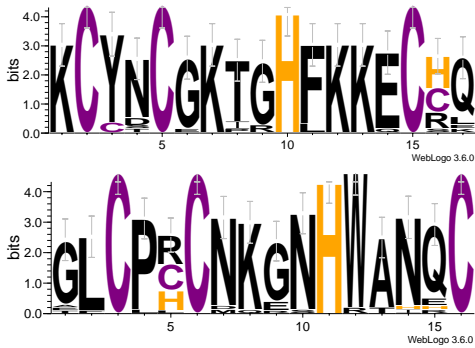

d

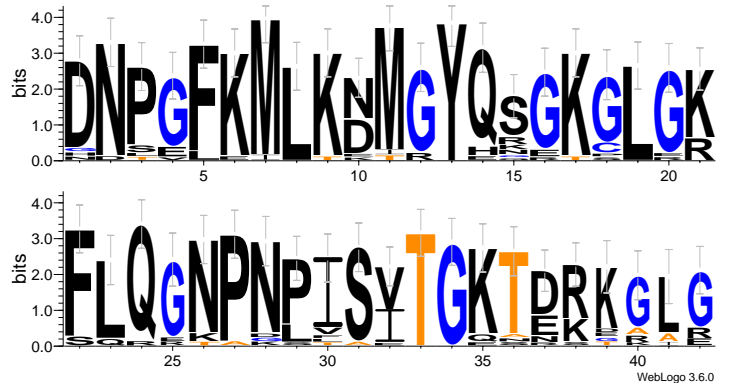

**Fig. S4. Sequence logos of PBS and beta-retroviral conserved motifs.** (a) PBS for lysine nucleotide sequence; (b) Type 1 and type2 Trimeric dUTPase consensus domains; (c) Gag nucleocapsid Zinc fingers and (d) G-patch domain. The height of symbols indicates the relative frequency of each nucleotide or amino acid. Logo created at <http://weblogo.berkeley.edu/logo.cgi>.

**File S.1** Coordinates of 66 HML-6 loci in genome assembly hg38 (A). Coordinates of HML-6 LTRs obtained by performing a BLAT search in genome assembly hg19 (B) and corresponding coordinates in genome assembly hg38 (C)

File S.1-A

#Coordinates of HML-6 loci in genome assembly hg38

chr1 102833274 102841125  
chr1 179437126 179443269  
chr2 127615267 127618672  
chr2 136071818 136077261  
chr3 14225058 14230262  
chr3 46046154 46054474  
chr3 46426543 46433630  
chr4 39539256 39544378  
chr4 68744586 68751238  
chr4 70552467 70554689  
chr4 77392282 77400204  
chr5 24649664 24654720  
chr5 70345178 70347402  
chr5 70662608 70664832  
chr5 71571897 71578401  
chr6 26288022 26296266  
chr6 32475495 32479598  
chr6 32559720 32567345  
chr7 150582298 150586225  
chr8 46483549 46491378  
chr10 43293134 43300924  
chr10 45278976 45286905  
chr10 108729222 108732968  
chr11 7899325 7906232  
chr11 62049779 62056355  
chr11 62251757 62254336  
chr11 112924628 112930083  
chr12 111816175 111825854  
chr14 28410708 28421231  
chr14 69811463 69816023  
chr16 30615697 30624281  
chr16 35516604 35524479  
chr17 43871997 43874812  
chr17 74584366 74586931  
chr19 9508031 9515060  
chr19 11853282 11860984  
chr19 21233790 21238065  
chr19 21786150 21792221  
chr19 22193241 22196548  
chr19 23864829 23871228  
chr19 51804696 51811939

chr19 51976151 51981430  
chr19 52410183 52414733  
chr19 52475656 52478698  
chr19 52984535 52989576  
chr19 57512616 57518488  
chr19 58305671 58315267  
chr20 1396802 1402704  
chr20 25394133 25403271  
Supplemental file 1  
chrX 53159114 53163826  
chrX 57102981 57109396  
chrX 74177999 74182492  
chrX 141196490 141199480  
chrY 17331572 17337109  
chrY 17846449 17851138  
chrY 17939128 17943709  
chrY 17962269 17966851  
chrY 18054873 18059562  
chrY 23818800 23823486  
chrY 24016101 24020788  
chrY 24116909 24121584  
chrY 24131605 24136211  
chrY 25533930 25538533  
chrY 25548553 25553226  
chrY 25649349 25654036  
chrY 25846607 25851293

#### File S.1-B

#Coordinates of HML-6 LTRs in genome assembly hg19  
chr1 3726436 3726881  
chr1 7987167 7987580  
chr1 17620399 17620877  
chr1 43958383 43958761  
chr1 56489619 56490037  
chr1 71451080 71451509  
chr1 76188046 76188610  
chr1 79009577 79009951  
chr1 93389962 93390429  
chr1 93907743 93908176  
chr1 103298845 103299251  
chr1 103306380 103306760  
chr1 110268139 110268554  
chr1 120105411 120105779

chr1 146949968 146950508  
chr1 170807169 170807675  
chr1 179406261 179406705  
chr1 179411934 179412404  
chr1 193294944 193295347  
chr1 207567068 207567833  
chr1 210516324 210516810  
chr1 216383544 216384044  
chr1 223092536 223092873  
chr1 228608876 228609259  
chr1 230267485 230267956  
chr1 236460382 236460661  
chr1 248594976 248595421  
chr1 248823340 248823653  
chr10 28427898 28428384  
chr10 35178167 35178669  
chr10 35824062 35824394  
chr10 38052008 38052441  
chr10 45774424 45774751  
chr10 45781908 45782346  
chr10 45983924 45984397  
chr10 78993260 78993654  
chr10 94110075 94110533  
chr10 110058823 110059225  
chr10 110492380 110492726  
chr10 122103698 122104163  
chr10 132156751 132157095  
chr11 7920882 7921320  
chr11 7927325 7927882  
chr11 13436788 13437299  
chr11 21872614 21873046  
chr11 32828468 32828973  
chr11 34906963 34907379  
chr11 48644865 48645423  
chr11 51398726 51399127  
chr11 55601736 55602119  
chr11 55925170 55925573  
chr11 59474385 59474793  
chr11 61817457 61817664  
chr11 61823437 61823827  
chr11 62019256 62019646  
chr11 62021584 62021782  
chr11 63290690 63291149  
chr11 65777525 65777955  
chr11 75077510 75078258  
chr11 77541298 77541757  
chr11 79908331 79908800

chr11 103784667 103785068  
chr11 107143229 107143630  
chr11 112795351 112795772  
chr11 112800384 112800806  
chr11 121156128 121156497  
chr11 123205510 123205925  
chr12 7417719 7418142  
chr12 31180017 31180432  
chr12 32207131 32207550  
chr12 50651122 50651610  
chr12 52894263 52894698  
chr12 61078597 61079215  
chr12 63370963 63371495  
chr12 72485393 72485861  
chr12 75799036 75799538  
chr12 85902867 85903283  
chr12 87468667 87469186  
chr12 93013694 93014123  
chr12 95777769 95778256  
chr12 112254025 112254385  
chr12 112263244 112263645  
chr12 132615766 132616288  
chr13 20391521 20391962  
chr13 21124638 21125206  
chr13 21485203 21485623  
chr13 31923229 31923624  
chr13 38132997 38133533  
chr13 47608913 47609192  
chr13 48036606 48036984  
chr13 56845686 56845882  
chr13 80971672 80972085  
chr13 80974139 80974432  
chr13 89308896 89309302  
chr14 24419623 24420011  
chr14 24454111 24454444  
chr14 24501858 24502246  
chr14 28879943 28880293  
chr14 28889706 28890387  
chr14 46184974 46185458  
chr14 46389038 46389323  
chr14 53014906 53015311  
chr14 53727103 53727500  
chr14 59974572 59975006  
chr14 60058391 60058892  
chr14 69975321 69975729  
chr14 70278180 70278613  
chr14 70282322 70282735



chr14 74068989 74069349  
chr14 74464742 74465148  
chr14 81431237 81431712  
chr14 84574926 84575396  
chr14 89349908 89350418  
chr14 92602683 92603108  
chr14 94257186 94257692  
chr14 103610511 103611000  
chr15 46107202 46107591  
chr15 73931913 73932323  
chr15 75776047 75776542  
chr15 84166048 84166306  
chr15 97648774 97649209  
chr15 98632647 98633064  
chr15 99556780 99557106  
chr16 4297468 4297865  
chr16 5621495 5621893  
chr16 13786771 13787194  
chr16 30627088 30627414  
chr16 30852688 30853366  
chr16 31524192 31524690  
chr16 32257398 32257811  
chr16 32694257 32694636  
chr16 33198366 33198779  
chr16 33254899 33255312  
chr16 34751001 34751352  
chr16 34758427 34758791  
chr16 34795001 34795381  
chr16 83573805 83574257  
chr16 84509228 84509645  
chr17 41949365 41949766  
chr17 41951900 41952042  
chr17 56764395 56764849  
chr17 72580513 72580888  
chr18 8232741 8233152  
chr18 20618154 20618949  
chr18 34432294 34432818  
chr18 36115401 36115948  
chr18 38761358 38761803  
chr18 44169018 44169415  
chr18 47407121 47407508  
chr18 47835072 47835561  
chr18 48489741 48490143  
chr18 61659925 61660324  
chr18 62262520 62263062  
chr18 74366292 74366862  
chr19 479045 479390

chr19 3175910 3176367  
chr19 5775122 5775959  
chr19 7844623 7845043  
chr19 9618783 9619111  
chr19 9625328 9625714  
chr19 11732166 11732593  
chr19 11737358 11737829  
chr19 11964097 11964500  
chr19 11971395 11971799  
chr19 15183791 15184248  
chr19 21416608 21416962  
chr19 21420456 21420850  
chr19 21810499 21810642  
chr19 21968990 21969348  
chr19 22171105 22171359  
chr19 22378948 22379334  
chr19 23170648 23171071  
chr19 23931072 23931459  
chr19 24047631 24047858  
chr19 24053601 24053989  
chr19 29185801 29186274  
chr19 37826313 37826753  
chr19 44538380 44538793  
chr19 45078200 45078643  
chr19 51917121 51917619  
chr19 52070175 52070357  
chr19 52307953 52308417  
chr19 52310314 52310738  
chr19 52474835 52475023  
chr19 52479160 52479513  
chr19 52484274 52484672  
chr19 52665769 52665913  
chr19 52679855 52680115  
chr19 52760294 52760489  
chr19 52834744 52835088  
chr19 52913439 52913567  
chr19 52917567 52917697  
chr19 57048245 57048636  
chr19 57949468 57949954  
chr19 58029449 58029855  
chr19 58826224 58826581  
chr2 3778020 3778474  
chr2 22013309 22013793  
chr2 47719622 47719827  
chr2 57088578 57089044  
chr2 57927119 57927602  
chr2 61874120 61874551

chr2 62005292 62005663  
chr2 86930880 86931290  
chr2 98599412 98600277  
chr2 108805858 108806342  
chr2 109173093 109173503  
chr2 110313051 110313473  
chr2 113348963 113349337  
chr2 118243711 118244102  
chr2 128372860 128373345  
chr2 128375753 128376241  
chr2 136829388 136829830  
chr2 136834392 136834831  
chr2 136834405 136834806  
chr2 139161141 139161621  
chr2 141032583 141033058  
chr2 152121029 152121169  
chr2 191099691 191100181  
chr2 216935214 216935721  
chr2 226002453 226002984  
chr20 1382935 1383348  
chr20 2607455 2607872  
chr20 25374835 25375216  
chr20 25607390 25607722  
chr20 31564461 31564855  
chr20 38199793 38200190  
chr20 43359229 43359666  
chr20 43717058 43717544  
chr21 31637970 31638454  
chr21 46176206 46176614  
chr22 20743505 20744271  
chr22 32792812 32793206  
chr22 36557747 36558155  
chr3 14266585 14266944  
chr3 14271299 14271678  
chr3 14926277 14926692  
chr3 14926693 14927049  
chr3 20883153 20883579  
chr3 20883153 20883721  
chr3 31097183 31097570  
chr3 32128212 32128641  
chr3 32130787 32131087  
chr3 46087658 46088073  
chr3 46095526 46095966  
chr3 46367632 46367865  
chr3 46468034 46468502  
chr3 46474679 46474870  
chr3 53698776 53699173

chr3 58208013 58208429  
chr3 80777576 80777939  
chr3 105381799 105382483  
chr3 106397535 106398024  
chr3 110703832 110704214  
chr3 121888584 121889062  
chr3 130192384 130192835  
chr3 158339012 158339398  
chr3 162847008 162847424  
chr3 167845230 167845621  
chr3 192952019 192952175  
chr4 3460048 3460458  
chr4 13667989 13668491  
chr4 18280081 18280562  
chr4 22935462 22935894  
chr4 36627538 36628033  
chr4 44965863 44966393  
chr4 56245089 56245533  
chr4 69610347 69610711  
chr4 78313550 78313824  
chr4 86131661 86132146  
chr4 95453365 95453858  
chr4 97419598 97420084  
chr4 99618431 99619149  
chr4 122716686 122717191  
chr4 130066045 130066589  
chr4 155851493 155851883  
chr4 163184252 163184640  
chr4 170740382 170741205  
chr4 188125776 188126269  
chr5 10366581 10367074  
chr5 24228050 24228413  
chr5 24649806 24650041  
chr5 24661006 24661221  
chr5 24735457 24735630  
chr5 33209413 33209846  
chr5 34842540 34842948  
chr5 36060366 36060708  
chr5 41474106 41474579  
chr5 41475923 41476105  
chr5 41475934 41476103  
chr5 68601315 68601724  
chr5 70867753 70868143  
chr5 70873777 70874228  
chr5 73005342 73005619  
chr5 78859814 78860531  
chr5 81906551 81906757

chr5 155392521 155392907  
chr5 165310570 165310906  
chr6 13674713 13675163  
chr6 23047098 23047881  
chr6 24443347 24443801  
chr6 26288282 26288644  
chr6 27600953 27601386  
chr6 29787400 29787610  
chr6 31477871 31478252  
chr6 32447002 32447348  
chr6 32527513 32527833  
chr6 52356379 52356839  
chr6 68851462 68851947  
chr6 86915713 86916109  
chr6 105240486 105240831  
chr6 118821444 118821912  
chr6 131374596 131374965  
chr6 131375876 131376252  
chr6 132180761 132181158  
chr6 142579561 142580052  
chr6 146821385 146821770  
chr6 168198309 168198732  
chr7 10355351 10355788  
chr7 14479522 14480505  
chr7 24394020 24394411  
chr7 38987147 38987483  
chr7 40641872 40642276  
chr7 43848142 43848619  
chr7 64216308 64216701  
chr7 67402960 67403452  
chr7 68897150 68897602  
chr7 79942369 79942788  
chr7 89360884 89361377  
chr7 108886592 108887005  
chr7 132550339 132550789  
chr7 137917885 137918274  
chr7 143010474 143010741  
chr7 150279896 150280192  
chr7 150282819 150282964  
chr8 11337327 11337810  
chr8 23279630 23280061  
chr8 27643708 27644102  
chr8 31038565 31038992  
chr8 34279311 34279655  
chr8 34334229 34334663  
chr8 39025663 39026077  
chr8 47395195 47395561

chr8 58378212 58378441  
chr8 112943341 112943808  
chr8 140020033 140020552  
chr8 144763153 144763619  
chr9 27297360 27297815  
chr9 28055932 28056407  
chr9 31908363 31908776  
chr9 31909242 31909640  
chr9 32524870 32525343  
chr9 36188192 36188616  
chr9 73687588 73688074  
chr9 83097302 83097799  
chr9 83610429 83610945  
chr9 97012896 97013384  
chr9 101772547 101773020  
chr9 106190906 106191442  
chr9 114366163 114366688  
chr9 117991624 117992126  
chr9 124669242 124669436  
chr9 124671461 124672141  
chr9 130457650 130458077  
chr9 134620310 134620748  
chr9 140838010 140838425  
chrX 3956051 3956543  
chrX 37224345 37224729  
chrX 37224395 37224725  
chrX 44176067 44176654  
chrX 53188300 53188691  
chrX 53192545 53193008  
chrX 55678560 55678935  
chrX 57129414 57129869  
chrX 57135384 57135829  
chrX 73401854 73402327  
chrX 79527661 79528374  
chrX 80336222 80336734  
chrX 92710608 92711124  
chrX 154624586 154625001  
chrX 155098267 155098756  
chrY 2755253 2755711  
chrY 6789090 6789480  
chrY 19443467 19443852  
chrY 19448578 19448928  
chrY 59201273 59201762

File S.1-C

#Coordinates of HML-6 LTRs in genome assembly hg38

chr1 3809872 3810317  
chr1 7927107 7927520  
chr1 17293904 17294382  
chr1 43492712 43493090  
chr1 56023946 56024364  
chr1 70985397 70985826  
chr1 75722361 75722925  
chr1 78543892 78544266  
chr1 92924405 92924872  
chr1 93442186 93442619  
chr1 102833289 102833695  
chr1 102840824 102841204  
chr1 109725517 109725932  
chr1 119562788 119563156  
chr1 147478218 147478758  
chr1 170838028 170838534  
chr1 179437126 179437570  
chr1 179442799 179443269  
chr1 193325814 193326217  
chr1 207393723 207394488  
chr1 210342980 210343466  
chr1 216210202 216210702  
chr1 222919194 222919531  
chr1 228421175 228421558  
chr1 230131738 230132209  
chr1 236297082 236297361  
chr1 248431675 248432120  
chr1 248660039 248660352  
chr10 28138969 28139455  
chr10 34889239 34889741  
chr10 35535134 35535466  
chr10 37763080 37763513  
chr10 45278976 45279303  
chr10 45286460 45286898  
chr10 45488476 45488949  
chr10 77233502 77233896  
chr10 92350318 92350776  
chr10 108299065 108299467  
chr10 108732622 108732968  
chr10 120344186 120344651  
chr10 130358487 130358831  
chr11 7899335 7899773  
chr11 7905778 7906335  
chr11 13415241 13415752

chr11 21851068 21851500  
chr11 32806922 32807427  
chr11 34885416 34885832  
chr11 48623313 48623871  
chr11 54720152 54720553  
chr11 55834260 55834643  
chr11 56157694 56158097  
chr11 59706912 59707320  
chr11 62049985 62050192  
chr11 62055965 62056355  
chr11 62251784 62252174  
chr11 62254112 62254310  
chr11 63523218 63523677  
chr11 66010054 66010484  
chr11 75366466 75367214  
chr11 77830252 77830711  
chr11 80197287 80197756  
chr11 103913939 103914340  
chr11 107272503 107272904  
chr11 112924628 112925049  
chr11 112929661 112930083  
chr11 121285419 121285788  
chr11 123334802 123335217  
chr12 7265123 7265546  
chr12 31027083 31027498  
chr12 32054197 32054616  
chr12 50257339 50257827  
chr12 52500479 52500914  
chr12 60684816 60685434  
chr12 62977183 62977715  
chr12 72091613 72092081  
chr12 75405256 75405758  
chr12 85509089 85509505  
chr12 87074890 87075409  
chr12 92619918 92620347  
chr12 95383993 95384480  
chr12 111816221 111816581  
chr12 111825440 111825841  
chr12 132131221 132131743  
chr13 19817381 19817822  
chr13 20550499 20551067  
chr13 20911064 20911484  
chr13 31349092 31349487  
chr13 37558860 37559396  
chr13 47034778 47035057  
chr13 47462471 47462849  
chr13 56271552 56271748



chr13 80397537 80397950  
chr13 80400004 80400297  
chr13 88656642 88657048  
chr14 23950414 23950802  
chr14 23984902 23985235  
chr14 24032649 24033037  
chr14 28410737 28411087  
chr14 28420500 28421181  
chr14 45715771 45716255  
chr14 45919835 45920120  
chr14 52548188 52548593  
chr14 53260385 53260782  
chr14 59507854 59508288  
chr14 59591673 59592174  
chr14 69508604 69509012  
chr14 69811463 69811896  
chr14 69815605 69816018  
chr14 73602285 73602645  
chr14 73998039 73998445  
chr14 80964893 80965368  
chr14 84108582 84109052  
chr14 88883564 88884074  
chr14 92136339 92136764  
chr14 93790840 93791346  
chr14 103144174 103144663  
chr15 45815004 45815393  
chr15 73639572 73639982  
chr15 75483706 75484201  
chr15 83497296 83497554  
chr15 97105544 97105979  
chr15 98089418 98089835  
chr15 99013551 99013877  
chr16 4247467 4247864  
chr16 5571494 5571892  
chr16 13692914 13693337  
chr16 30615767 30616093  
chr16 30841367 30842045  
chr16 31512871 31513369  
chr16 32246077 32246490  
chr16 32682936 32683315  
chr16 33297125 33297538  
chr16 33353658 33354071  
chr16 35516630 35516981  
chr16 35524056 35524420  
chr16 35560630 35561010  
chr16 83540200 83540652  
chr16 84475622 84476039

chr17 43871997 43872398  
chr17 43874532 43874674  
chr17 58687034 58687488  
chr17 74584374 74584749  
chr18 8232743 8233154  
chr18 23038191 23038986  
chr18 36852331 36852855  
chr18 38535437 38535984  
chr18 41181394 41181839  
chr18 46589055 46589452  
chr18 49880751 49881138  
chr18 50308702 50309191  
chr18 50963371 50963773  
chr18 63992691 63993090  
chr18 64595285 64595827  
chr18 76654335 76654905  
chr19 479045 479390  
chr19 3175912 3176369  
chr19 5775111 5775948  
chr19 7779737 7780157  
chr19 9508107 9508435  
chr19 9514652 9515038  
chr19 11621351 11621778  
chr19 11626543 11627014  
chr19 11853282 11853685  
chr19 11860580 11860984  
chr19 15072980 15073437  
chr19 21233806 21234160  
chr19 21237654 21238048  
chr19 21627697 21627840  
chr19 21786188 21786546  
chr19 21988303 21988557  
chr19 22196146 22196532  
chr19 22987846 22988269  
chr19 23748270 23748657  
chr19 23864829 23865056  
chr19 23870799 23871187  
chr19 28694894 28695367  
chr19 37335411 37335851  
chr19 44034227 44034640  
chr19 44574952 44575395  
chr19 51413867 51414365  
chr19 51566922 51567104  
chr19 51804700 51805164  
chr19 51807061 51807485  
chr19 51971582 51971770  
chr19 51975907 51976260

chr19 51981021 51981419  
chr19 52162516 52162660  
chr19 52176602 52176862  
chr19 52257041 52257236  
chr19 52331491 52331835  
chr19 52410186 52410314  
chr19 52414314 52414444  
chr19 56536876 56537267  
chr19 57438100 57438586  
chr19 57518081 57518487  
chr19 58314858 58315215  
chr2 3730430 3730884  
chr2 21790437 21790921  
chr2 47492483 47492688  
chr2 56861443 56861909  
chr2 57699984 57700467  
chr2 61646985 61647416  
chr2 61778157 61778528  
chr2 86703757 86704167  
chr2 97982949 97983814  
chr2 108189402 108189886  
chr2 108556637 108557047  
chr2 109555474 109555896  
chr2 112591386 112591760  
chr2 117486135 117486526  
chr2 127615285 127615770  
chr2 127618178 127618666  
chr2 136071818 136072260  
chr2 136076822 136077261  
chr2 136076835 136077236  
chr2 138403571 138404051  
chr2 140275014 140275489  
chr2 151264515 151264655  
chr2 190234965 190235455  
chr2 216070491 216070998  
chr2 225137736 225138267  
chr20 1402291 1402704  
chr20 2626809 2627226  
chr20 25394199 25394580  
chr20 25626754 25627086  
chr20 32976655 32977049  
chr20 39571150 39571547  
chr20 44730588 44731025  
chr20 45088417 45088903  
chr21 30265652 30266136  
chr21 44756291 44756699  
chr22 20389215 20389981

chr22 32396825 32397219  
chr22 36161699 36162107  
chr3 14225085 14225444  
chr3 14229799 14230178  
chr3 14884770 14885185  
chr3 14885186 14885542  
chr3 20841661 20842087  
chr3 20841661 20842229  
chr3 31055691 31056078  
chr3 32086720 32087149  
chr3 32089295 32089595  
chr3 46046166 46046581  
chr3 46054034 46054474  
chr3 46326141 46326374  
chr3 46426543 46427011  
chr3 46433188 46433379  
chr3 53664749 53665146  
chr3 58222286 58222702  
chr3 80728425 80728788  
chr3 105662955 105663639  
chr3 106678688 106679177  
chr3 110984985 110985367  
chr3 122169737 122170215  
chr3 130473540 130473991  
chr3 158621223 158621609  
chr3 163129220 163129636  
chr3 168127442 168127833  
chr3 193234230 193234386  
chr4 3458321 3458731  
chr4 13666365 13666867  
chr4 18278458 18278939  
chr4 22933839 22934271  
chr4 36625916 36626411  
chr4 44963846 44964376  
chr4 55378922 55379366  
chr4 68744629 68744993  
chr4 77392396 77392670  
chr4 85210508 85210993  
chr4 94532214 94532707  
chr4 96498447 96498933  
chr4 98697280 98697998  
chr4 121795531 121796036  
chr4 129144890 129145434  
chr4 154930341 154930731  
chr4 162263100 162263488  
chr4 169819231 169820054  
chr4 187204622 187205115

chr5 10366469 10366962  
chr5 24227941 24228304  
chr5 24649697 24649932  
chr5 24660897 24661112  
chr5 24735348 24735521  
chr5 33209307 33209740  
chr5 34842435 34842843  
chr5 36060264 36060606  
chr5 41474004 41474477  
chr5 41475821 41476003  
chr5 41475832 41476001  
chr5 69305488 69305897  
chr5 71571926 71572316  
chr5 71577950 71578401  
chr5 73709517 73709794  
chr5 79563991 79564708  
chr5 82610732 82610938  
chr5 155965511 155965897  
chr5 165883565 165883901  
chr6 13674481 13674931  
chr6 23046870 23047653  
chr6 24443119 24443573  
chr6 26288054 26288416  
chr6 27633174 27633607  
chr6 29819623 29819833  
chr6 31510094 31510475  
chr6 32479225 32479571  
chr6 32559736 32560056  
chr6 52491581 52492041  
chr6 68141570 68142055  
chr6 86205995 86206391  
chr6 104792611 104792956  
chr6 118500281 118500749  
chr6 131053456 131053825  
chr6 131054736 131055112  
chr6 131859621 131860018  
chr6 142258424 142258915  
chr6 146500249 146500634  
chr6 167797629 167798052  
chr7 10315724 10316161  
chr7 14439897 14440880  
chr7 24354401 24354792  
chr7 38947547 38947883  
chr7 40602273 40602677  
chr7 43808543 43809020  
chr7 64755930 64756323  
chr7 67937973 67938465

chr7 69432164 69432616  
chr7 80313053 80313472  
chr7 89731570 89732063  
chr7 109246535 109246948  
chr7 132865579 132866029  
chr7 138233139 138233528  
chr7 143313381 143313648  
chr7 150582808 150583104  
chr7 150585731 150585876  
chr8 11479818 11480301  
chr8 23422117 23422548  
chr8 27786191 27786585  
chr8 31181049 31181476  
chr8 34421793 34422137  
chr8 34476711 34477145  
chr8 39168144 39168558  
chr8 46483573 46483939  
chr8 57465653 57465882  
chr8 111931112 111931579  
chr8 139007790 139008309  
chr8 143680983 143681449  
chr9 27297362 27297817  
chr9 28055934 28056409  
chr9 31908365 31908778  
chr9 31909244 31909642  
chr9 32524872 32525345  
chr9 36188195 36188619  
chr9 71072672 71073158  
chr9 80482387 80482884  
chr9 80995514 80996030  
chr9 94250614 94251102  
chr9 99010265 99010738  
chr9 103428624 103429160  
chr9 111603883 111604408  
chr9 115229345 115229847  
chr9 121906963 121907157  
chr9 121909182 121909862  
chr9 127695371 127695798  
chr9 131744923 131745361  
chr9 137943558 137943973  
chrX 4038010 4038502  
chrX 37365092 37365476  
chrX 37365142 37365472  
chrX 44316821 44317408  
chrX 53159118 53159509  
chrX 53163363 53163826  
chrX 55652127 55652502

chrX 57102981 57103436  
chrX 57108951 57109396  
chrX 74182019 74182492  
chrX 80272162 80272875  
chrX 81080723 81081235  
chrX 93455609 93456125  
chrX 155394937 155395352  
chrX 155868604 155869093  
chrY 2887212 2887670  
chrY 6921049 6921439  
chrY 17331587 17331972  
chrY 17336698 17337048  
chrY 57055124 57055613

**File S.2** Fasta alignment of HML-6 type 1 and type 2 consensus sequences generated by Geneious software (A) and collection of HML-6 Rec amino acid sequences and a Rec amino acid consensus also generated by Geneious software (B)

File S.2-A

#Alignment of type 1 and type 2 generated consensus sequences

>Type\_1\_consensus\_sequence

```
TGTAGGGAGCCGAAGGCCCATGGGACGTGACCAACTCAGCATTCCACTGGAGGCTATATGATCAAAC
AGCAAACGTTTATCATGAATGCAGGATGTGGGCAAACCTCAC-
GACTGCGCCTGCCACCAGAAGGTTTGGCTGAGGGCCATCACTCCCTGGGCGCCGG--
GCTCCTTGAGGTTATCTACTGAGAAATCTAGAGCCTATTGTTTGAAGAATGCAGTCTTGCAAGCCTG
CTGTGGACCAAGCAGCTGACCCCTTCTTCCACCCCCCTTCTCACTATCTCTTTTGCCTAAATAAATAC
GGAGGGCTGTGTAAAGCTCAGG-----GCCCTTGTCCACTAGAGGCAAGGTGCCCCCT-----
GACCCCTTCTTCAAATATACTCTTTTGTCTCTTGTCTTTTATTCCCGCGTTTCGCCCCCTTTGTTCA
GTCCCCCTAGGTCCTG-----
GCGGGTTACATAGTGGCGCCCCGAACAGCGACAGAATCGGGTGTCTACAAGTGGCGCCCCAGAMM
AGGGACTMATAGGGTGTCAACAAGTGGTGACTCAGAACAGGG-----
-----ACGCCAAGGAYKCCAACAAGTGGCACTYGAACAGGCRACAGTCCRAACACAGGGAC---
TTCGAGGACGTGAACGAAGAAGGTTCTGTCTGGAGCAGAGGAA-----
CTGAAATTGACAAGGCCGAACGAGAATGGGGGACCCCGGGATGAGTCTGCCGGCAGCGGATATAATT
ATGGTCAGTGCCCTAAAGAGGTAAGTACTGATCAGTGCCCTAAAGAGGTAAGTGGGAGCKGYMSMARATACAA
GATCAGTGCCCTRWRKMSKWAMKRGGATATAAGGTCAGTGCTTTAAAG
AGGTA-----
CTGAGTACTGGGAATGGGAAGTTTTCTGAATTCAGGGTAACATGGGGGCAGAATTTGTCTATTGAA
GAAAAACGATTATGTGCAGTTGCTTAAAGTTCTGATCCCAGCCGTTTGAAACAGTCTGGAGCTCAG
GTTAATTCTCAGACATTAACCTAAGCTGCTGCAGGAGCCACAAAAGTTATTACGCATAACCCATGG
TTTCCACAGCTTGCAGGCACTCTTGTATGTGAAAATTGGGACAGAGCAGGAGAAGGATTA AACAGGC
TCATGCAAAAAGGTCTTAAAGTTGATTCTTCTGTTTTCTCCACTT-----
GGAGTTTAGTTCGTAAGTACTGACTTCTGCCATTATCTCCTAGCCTGGTGACAGAGCGAGATATTATTCT
GCTGGACAGCAGGAGTCATGTTCTGAGTCTAAAAAATCTGAAAGAATCTGTCTGTCCCACCCACAGC
TCCAATTGAAAATAAAAAACAGGAGAGGGAGGATAAAAATTGGCTGTTTGTCTATACCGCCTCCTCC
AGTTGCAGAAAATTCATCTGTACCGCCTCCTTCGGTAGCAGAAATAGAGAYCCCCAATACAAAGAA
TTTTACGCTCTGCTGCCATAGCTAAGGAGAGCCCTTAGGACCTTGCCTTTTCTTATTTCCGTAAGG
CCTGATCCAAATAATCCACAGCAGCTTATTCATGAACACACTCCCCAACTAGAGTTTAAAGTTGTTG
AAGGAATTA AAAGTTCGAGTGTGGTAAATAATGGCGTACAGAGCCCATTCACTTTGGAGGAAGGATT
GCTAGAATCTGTGTTTGGTGTCTATGCGTCTTTTACCCTTTGATGTAAAACACTTGGCTCGAACTTGC
TTGTCTGCTAGTGCATATCTGACATGGAATTTAAATTGGCAAGAAATGTGTGCAGACCAGGCTAGA
CAGAACCGTGCTGCTGGACACGGAGACATTTACAGAGGATATGCTGTTAGGTAATGGCCCTTTATTC
AGACCTGGAACATCAAATGGCACTCCCTTAAAGAGATGCTGCTTATCAGCAGTGTGCACAGGCCGCTA
AATGTGCCTGGGCCACAATTTCACAATTCCTGAAGAGGGAGTACCAGTACAATCCTTTTTTACATAT
CATGCAAGGGTACAGGAACCCTATGCACAATTTCTTGCTTACAAGAAAATTACAAGATTACARRA
GGCAAGATTACAAGAGGCAGTGAAGCRTCAGATTCCTCATACCACGGCTGCAGAAATGCTAACCTT
AACTCTAGCTTTTGAAGSRRSWSATTGGAGCAAAYGCGGATTGTAAAAGTGCAGTGGCACCTGT
GAGGTGTACAAAAAAGTTGGGAAATTTCTCVAGAGCTTGTGAGGATGTAGGAACTGAGCTTCATC
GCTCTGCAATGTTAGCTCAAGCAATGGCTAATTTAGCAGTTGACAAATCTAGAAAAGATAACAAAT
```



CTAAAAAGGAGCCAAGGGTCAAACCCTAAAATGGAAAAAAAAAAAAAAAAACCCCTAAAATGGGAAAAT  
GTTATAATTGCTCTCCTAYCCCTGGAAATAACTGGACATTTTAAAAAGGAATGCCACCCAGATCTC  
AGGACAGAAAGGACCTTACAATGCAGTGCACCGCCCCCMCCMACCCCKGCCCCAGCGGAAAAAA  
AACGCCAGGACTTTGTCCTCGCTGTAACAAAGGAAATCACTGGGCTGTAACAATGGACATCATTGG  
GCCAATCAGTGCCGCTCAAAATTTTCATCAGAATGGCACCCCCCMCCCCATGTCGGGAAAYGAGAAG  
GGGGCCTGGACCCGGGCCCTCAAACAATGAGGGCATTCCCAGTCCAGACCACAACCCCATTTTCAGG  
GATGGGTTCCCGGAGGCACATTGATTGATTCCCTGGTGTTCCTCACCCAGGAACACCAGGAAGTGCA  
GGATTAGATCTCCAGCCAGAGAAAGAATTACATTAGTTGGGGGAGACAAACCTATCAAAGTTCCC  
ACTGGCATTGTTGGGACCTTTACCAGCAGGATACATGGGTATATAGGACACTAATTTTAGGCAAAAG  
CCAGCCTTAACCTGCGAAGGCATTACTGTAGTCCCAGGAGTTGTTGACTCTGATTATGAAGGAGAA  
ATTCAAGTAGTTTTAATGTCAACAAGATCTTTGGGTTTTGAACCGGGAGAATATATTGCTCAATTA  
TTGCTTATTCCTGCAAATTACACCCTTCTCCATGAAAGGAGAAATGAGGAAATAAAGGGTTTGGG  
AAGCACAACCTACATGGGAAATCTATCTATCCCAACCCAATTYTAGCCTCTAATAGACCCACCTGTGT  
AGTACAAATTAAGTCCTTGAGGAAGGGGTGAGGAAAGAAATTTTATGGGCTTATGGATACAGGAG  
CTGATGTGTCAGTAATATCTAAAGACAATTGGYCCCCATCCTGGCCCTTGCAATTAACCTATCTACA  
TCCCTAGTGGGAGTAGGAAAGCAGCAATCTAGTACAGCTCAAAGTGTTCACAGAGTGCTTTTGAG  
ACTTTTACCTTGTCTTGGTCCGGATGGACAGTCATGTTTATTTAATAAACCTTTACAACCTTAA  
GCTCTCTCAACTTTTACGCCTTATGTTGCAAATATAGCTATCAATTTATGGCTATAAATTGATAG  
CCATATCGGTYGAGACTTACTTACAGCATGGGATATGAGACTTAACAAATGAAAACCTTTGATAACC  
CAGGATTTAAAATGTTGAAGAACATGGGATATCAGAGTGAAAAGGTTTAGGGAAAATTCCTACAA  
GGAAACCCTAACCCGATATCAGTAACTGGAAAAACAGATAGAAAAGGGCTAGGACGTCAGGATTT  
CTGATGGGGGGTCAATTGATATTTCTCCTCCACCCACTGCCTTACCATTAGAATGGCTYAGTGACAAA  
CCTGTGTGGGTGGATCAATGGCCCCTAACACAGGAGAAGCTAGATCAACTTCATCTGTTGGTAAAA  
GAACAATTGGATGCAGGACATATAGAGAAGTCAGTTAGCCCCTGGAATTCACCAGTGTTTGTTATT  
CCAAAAAAGTCCGGAAGATGGTGACTGCTGCATGATTTGAGAGCTATTAATGCACAAATTAACC  
GATGGGTGCATTACAGCAAGGTTTACCATCTCCAGCGGCCATTCCAAGAGACTGGCCTCTTGATAGTA  
ATAGATCTTAAGGATTGWKWYTTTTCTTTACTATACCCTCCTTACAYGAGAAGGATAAGCCTCGATTT  
GCCTTCTGTGCCTTCTATTAATACAAAGAGAACCTGTTTCTCAYTATCAATGGAGA

G

TTTTACCCCAAGGCATGCTTAACAGTCCCTACGCTATGTCAGCATTGTTGTAGGACAGGCATTAAGGA  
GCCTCGRAATATGTTTCCTACTGCTTACATCATTCAATTTTATGGATGATATTCTTTTGGCCRCTCCT  
ACAGATCAAATCTTACATCAGTTATTCAGAGAAACAAAGCARGCTTTTRYTAAATGGAATCTCAA  
ATTGCTCCAGAGAAAGTACAAACAACCTCCCATACCATTACTTAGGAACTATTGTTACWGAGAAG  
TGACGGCCTCAGAAAGTAGTTCTCCATAAAGACAGGTTACAGACTTTAAATGATTTTCAACAATT  
ATTAGGAGATATTAATTGGCTATGMCCAATGCTAGGTATTGCTGCTACCTATCAACTTACACATCT  
TTACCAAACCCTGCAAGGAGATTCTTCTTTAAAWTTCCCCGCAGCAATTAATAAGAGGCAGAAC  
GCCGAGTTACAGCTTGATAGAGCAGATGTTACAGCAGAGACATGCCTCACGGCTACAGCCACAAAAAC  
CTTTGCTTTTGTATTCTTCTTACCCCCCACTCTCCAACAGGACTTTTGGGCCAGTTCATAGACA  
AGTCTGTAACAGTAATAGAATGGCTCTTTCTACCTAATCAAACAGTCAAACCTTGCAAGTTTATC  
TTTCTTTAATTACACAAATTGTGACTATGGGCAGGCATAGGTCAAAAATGCTTATGGGATATGATC  
CTGACAAAATTATTGTTCTTTAGACTCCCAGCAACARGCCACAGCTTGGGAAATGTCRACTGCCTG  
GCAAATTGCTTTTGCAGACTTYGTGGGTGCWATAGAATAACCACTATCCCTCAGACAAAATTTTRC  
AGTTY-

CNSNSUSTYCNSNSUSTTATAAARTCCATTCTTTTCATCTTCTCCTGTGATTAATTCATTACTCATCACAAAGC  
CTATTC

CAGGTGGCCAGACTTATTTTACTGATGGCTCTTCCAAAGGTCATGCAGCTATCTATGGACCTAAACA  
TACTCAAACAATAATCTGACCTCTGGGGTTTCAGCTSCAATGCTCAGAGCTAATTGCAGTCAATTCGT

GAGGTTTTACAGCTCACAGCTTCAGATCCTATCAACTGCAGGGACCCGAAGGCCCATGGATTGTCTG  
TGATTTCAGCATTCCTACTGGAGGCTATATGATCAAACAGCAAACCTTTATGTTGTAAATGTAGCCAGTS  
RCAWTCACATAGAACAATTATATACTGCTACAATTAAGTACACTAGAVBDCCCAGAACTGCTTG  
AAGTTATCTATTGAGAATTTGTTTTYAAGACTTCAACAAGCTATTCGCTCTCATGCAGCTCCTTTTC  
ATATTGCTGTGAATCAGGCTTCTCATATTCGCTCTCACACACAAC TTCTGGACCACTATCTCTAGG  
TAATGATAGAGCAGMTATAAACTGATTGGTTCTGTGTTTCAGCAAGCTCAAGCVTCTCATGCGCTA  
CTGCACCAAAAATACACTCTTTTATCTCTTGTCTTTTCTGCCCTTACTCGCATGTTCCATTTATCTCGC  
AGCCAAGCGTGGCAGGCTACAATCAACATTGTCAACCATAGGGCTATAATACAAGCCTGTCTACTT  
GCCAGCATGKCTCCCTGGAGCCATTAATTGGCTACGCCACCTGTAGAAGGCTGTAACCCACGAGGT  
TTGGCTCCAAATGAAATTTGGCAAAATGGATGTTACACATATAGCAGCCTYRSWRTTGGTAAGCTT  
AGCTATGTTTCATAGAACTGCTACAGTTAAAAGTACGCTAGACCCAGA ACTGCGTGACTATAGACA  
CTTATTCTCATATGCTGCATGCTACATGCCAAACAGGTCCACACCTCGAGACAGCTGGTCATGTACA  
GTGACATTGTCTGTATCATTTTGTCTCATATGGGGATACCTAAAGCGTGAGCCACCGCACCTGGCCCA  
ATTA AAAACTGACAAATGGACCTGCTTATACTTAGTCATGCTTTTCAAAA TTTCTTACAGCTTTGG  
GCTATAACCCATAAAAACAGGAATTCCTTATAATCCTAGAGGACAAGGCATTATAGAGCGGGCACAT  
CAAACATTACAACGCATGTTGAAAAAACAAAAAGGGGTATAGGAGGCCAACTACCACCTCAATCA  
AAACTACATTTAGCCTTATTTACTTTAAA TTTTTTTGACTCCTGGTAYGGATGGTTAAGACTCCAGC  
AGAAAGACATTGGCAAGTGTAGAGGAAAAGAGGAAAGTTTATCCGAAAGTGTATGGAATCCCC  
CGGAAGAAGGACAATGGAAAGGTCCGGTGGATTTACTGACGTGG-----  
GGAAGAGGGTATGCTTGTGTTTTTACAGGAGATGGGACAAACCGTGTGGGTGCCCTCAAGGTGCGT  
GCGACCATGGAATGGGAGACTGGAGGAACCCAGGGTGGCCAACCATGGGCCCCGTCCCTCCGGTACG  
AGCCATGAGCCAGCTGAGCCTGAGTGCAAAGACGGAGAGAAGGCCGACCAGAGTCACGACGACATCAAC  
CCCCATAACCTGGGGACA ACTCAAGAAAACCACGCAGGA  
AGCTGAGAACTACTGGAGCATCAGGGCCAGGCAAAAACCCCTGATTCCATGTTCTTGGCCATGTTA  
GCCATAATGTCTGTGCGGTATGTTTTCCCTGTGCAGAGGCAAAAACATATTGGGCATATGTTCCCA  
ATVCCCCCAGCAGTATGACCTATACTTTGGAGTGACACTCCTCCTGAGTGATTTATCATGATCAGGG  
AGCGTGGGCTCCAGGACCCCTATGTCTGACTCCCCCTGACATAGAACAGTTAGACTCTCAGAACAAT  
GTCATTAATTATAACCGCTCCACTGGAAGGACTCCCTTTGTGTATCACCACAAAGAYGTCACTCAGCC  
ATAGCAGYTGCTTACAATTCAAGCTCAAACATGGTTGAGTCACTATGGA AAAARTCATGTACTTAT  
TAAGTCTTGGTTCTATTAATGTA ACTGGTGTGCTAACCAACCA TTCCCGGCCAATCRCCCTAATTG  
TGCTGACTATAYGGAATGGATTCCTGCCTCAATAGTTCCTACCCCAATCCATGGACCCAGTGTC  
TTGGCCCACTGGCTAGAAAACAATCTATGTTAACTGGAGACATTGTGGATTGGGGACCTAAAGGTC  
AATTAGATGGA AAAAGATGAAAATCAGAAATCATGGCACAACTTCGCTGGCATTGGTGGCAAGCTT  
TTAATGCTTCTTCTTTATAACAACACTGGGATCCAA TCCAGTCTGCCRCCAGATTGCTTGGCATGG  
AGCAGGCTTTAGCCCGCTCTTCCTCAGTGGCATTATCTAGGGAGGAAAGGACCAATTCAAGAGACG  
ATATGGAAGGCAGCACTCCCATTTATGAATGGCAGCATCTGGGTTGYYAGGATACTATCCAATAAT  
AGCAATAGTAAGCAAMTRKYTCACAGTTTTAATGTTACATTTGTAAAGAATATCACCAC TCAATTT  
ACAGTTTGTGTTTTTAATCCTTATGTCTTTTTTGGCAGCTAAGAAGGACCAGCTCCAGGTAAACAAT  
ACCCAATTGACCTGTAAATCTTGCCAGTTATATCACACTGCATTAATCATAGCACATTGCAAACAC  
ATAATATCTCTACTTTGAGGTTTTTTGATTTTAGGTCGCATCCCTGGGCTATGGATTCCGTGTTAATC  
TGTCTAGAGCCTTGGGCTGCCACACCTGCTTTGCATTTTGTGAAACTTCTTCTAACTCAGCTTACT  
CATCGTGTCCGTAGAGCCTTAGGCATGATAATTTTTGCTATTGTTTCTTGGTCACTAA TAACTT  
CTGTTGTGATGTCCTCTGTAGCTTTGCATAGTTCATTTCAAACAGCTCAGTACGTGGAGA ACTGGAC  
ACAGCCAAMSRMGTACAGCCAACCAAGCATGGCTACTTCAGAATAAAAATTAACACTGAGTTACAAA  
CTGAAGTGGCAATGTTGAAATCCATGGTTCTATGGTTAGGGGAACAAGTACAAAGCTTGCAATTGC  
AGCAGCAATTGCGTTGTCAATTTAATCACACTCATATTTGTGTAACCAATGCTTAGAATATAACC  
AAAGTGAGTATCCATGGGACCTTGTGAAAGCCATTTGCAGGGAGCTTTACATCCAACATCACCTT

TGATATTGGTGAATTATAAAAACAAAACAAAATTCTTGATTTAAATAAGCAAACCTCAAGAGTTTCAG  
CCTTCTTTAGAACTGGACCGGAATTCAGCAAGGCCTGGAGAGCCTCAACCCTTGGACCTATCTA  
AAGCACCACGTTAATTAACATCTTATATGTAGTTCTTGGAATAATGTTGTTTTGTCTCTTGCTTCT  
GTTTCATAGTCTGTAAAATCGGATGGACCGCAATCAGAAAATGAGAGCTGCCAGCCTGGCCTTAAC  
ATTCTTTCAATTAATACATAAAAACAGAAAGGGGGAATTGTAGGGAGCCGAAGGCCCATGGGACGTGAC  
CAACTCAGCATTCCACTGGAGGCTATATGAT  
CAAACAGCAAACCTGTTTATCATGAATGCAGGATGTGGGCAAACCTCAC-  
GACTGCGCCTGCCACCAGAAGGTTTGCTGAGGGCCATCACTCCCTGGCGCCGG--  
GCTCCTTGAGGTTATCTACTGAGAAATCTAGAGCCTATTGTTTGAAGAATGCAGTCTTGCAAGCCTG  
CTGTGGACCAAGCAGCTGACCCCTTCTTCCACCCCCCTTCTCACTATCTCTTTTGCCTAAATAAC  
GGAGGGCTGTGTAAAGCTCAGG----GCCCTTGCCACTAGAGGCAAGGTGCCCCCT-----  
GACCCCTTCTTCAAATATACTCTTTTGTCTCTTGTCTTTTATTCCCGCTTCGCCCCCTTTGTTCA  
GTCCCCCTAGGTCCGT-----  
GCGGGTTACATAGTGGCGCCCCGAACAGCGACAGAATCGGGTGCTCTACAAGTGGCGCCCCAGAMM  
AGGGACTMATAGGGTGCTCAACA  
>Type\_2\_consensus\_sequence  
TGTTGGAGGCCGAAAGAGTGAGGGTCGTGATCAACTCAGTATAACACTGGAGGCTATATGAGTAAA  
CAGCAAACCTGTTCTCATAAATGCAGAATGTTGGCAAACCTGACAAACCTGCGTCTGCCACCCAGAAGGAAT  
GCTGAGGGCA  
GTCACGACCCAGGCGCAAGTGTCTTGTGATTA-----GGCACATCTGAAGCCTGTTA-----  
GTAATAATGTGAACCTGTGATCAATTAAGCAGCTGACCAATCGTT----  
ACCTCCTCCTCCCTGCTCTTCTACCCAATAAATACGAAGGGCTGTAGAAGCTCAGGGCGGCTGCCT  
TTGCTCACTAGAAGCAGGGAGCCCTCTTCTTCTTCCCTGGACCCCTTCTTTAAAACAGTTTCTTTTG  
TCTTAAGTTTTTCAATTTCTACGTTGTCCTCCCTTCGTTTCAGTCTTGTAATGACGGTCTCAAGTAGTAACA  
GTAGTA  
ACTGTTGTAGTGATGGTCCAAGTAGTAACCGTGGC-AGTCTG-----  
CCACAAGTGGTGCCT--  
GAACAGGGACATTTTCAGAGACTATCAGGGACAAACAGAGACCTGAARRGACCTGRAGGGACCTGAA  
GAGGCCTGCAGGGAYAAAYAGAGATAAGTRGRGRRTAAGTACAGAAAAGTAAGTAGAGATARATAA  
ATAGAGAMAAGTAGAGATAGGTAGGGAAAGACAGGGACTTGCAGGAACTAACAGGTACYATAGGG  
ACAGACAGRGACAGATAGGGATAGACTAAAGACTAGCAATATAAGGTCAGTGCCCTGAAGAGGTAC  
TGGTCTGTGTCCTAAAGAGGTACAAAAGTAGGGACTAGCAAAGACTAGCAGAGACTTGSAGGRACA  
GAACAGGGACAGAATAGSGATAGGGACAGATAGGGTCTATAGGGACTTGAACGAGGAAGGTCTGC  
TGGAACAGAAAAAARAAAAAATAAAGCCC-----AGAAAA-----  
AAAATTAACAACTAAACCAACCCAGATGAAYGAGAAACCCATTACAAGTCTGCTGGCAGCGGACA  
TAAGGTCAGTGCTCTAAAAAGGTACTG-----  
GGATATAAGGTCAGTGCCCTAAAGAGGTACAAAGAATGGGAAGTTTTTTGAATCAGGGTAACATGGG  
GGAAGAATTTGGCTATTTCTTTCTCTTTTTTGTGTTGTTGGGAGTTTGGTATGTACCATCTTTTG  
TTATTATTTCT-----  
AAAATTTGAGAGAATTTTTTGGCCACCTACAGCACCTATCGAAAGTGGTGAACAGGAGAGGGAGAAT  
GAAAATTGGCT-----  
-----TG TACCGTCTTCTTTTGT-----  
-----  
-----  
-----  
-----  
-----



-----  
-----  
-----  
-----  
-----

-----TAAAATAAATAAAAAAGA-----  
AAAMAYTTTTGCTTCT-----

-----  
GYTTTGGTAGATTTACTAACGTGGCAAACTGCGGACGAGGGTATGCTTATGTYTTTACAGGARATGA  
ACAAACCRGTGTTGGTGGCCCTCAAGGTGTGTACGACCATGGAACAGGAGACTGGAGGGA  
CCCATG  
GATCCCAACCAYGGGCCTGGTTCCCCCAGTAYGAGCCATGAGCCAGTTGAATCTGAATGYGAAGACG  
RACTRAACSACCAACYRGMAYCACMMKSWSATTA AVGGCTGCA-----

-----CATTNTGSA-----  
-----ATTRCCTTNTTCAA-----

-----TTAATTTAA-----

-----AAACAAAAGGGAGAG-----  
AAAACAGGACGAG-----  
TGTTGGAGGCCGAAAGAGTGAGGGTCGTGATCAACTCAGTATACCACTGGAGGCTATATGAGTAAA  
CAGCAAACCTGTTCTCATAAATGCAGAATGTTGGCAAACCTGACAACTGCGTCTGCCACCCAGAAGGAAT  
GCTGAGGGCA  
GTCACGACCCAGGCGCAAGTGTCTTCTTGTGATTA-----GGCACATCTGAAGCCTGTTA-----  
GTAATAATGTGAACCTGTGATCAATTAAGCAGCTGACCAATCGTT-----  
ACCTCCTCCTCCCTGCTCTTTCTACCCAATAAATACGAAGGGCTGTAGAAGCTCAGGGCGGCTGCCT  
TTGCTCACTAGAAGCAGGGAGCCCTCTTCTTCTCCCTGGACCCTTTCTTTAAAACAGTTTCTTTTG  
TCTTAAGTTTTTCAATTTCTACGTTTCGTCCTCCCTTCGTTTCAGTCTTGTAATGACGGTCTCAAGTAGTAACA  
GTAGTA  
ACTGTTGTAGTGATGGTCCAAGTAGTAACCGTGGC-AGTCTG-----  
CCACA

File S.2-B

# HML-6 Rec amino acid sequences and HML-6 Rec consensus sequence  
>HML-6 Rec consensus

QEMDKPCGCPQGVCDHGMGDWRDPWWPTMGPVPPV\*AMSQLSLSAKTERRPTGVTMTSTPITWG  
QLKKTQEA EKLEHQQQAKTPDSMFLAMLAIMSCAVCFPCAEAKTY  
>Protein\_ERVK3-1\_HML-6  
QEMDKPCGCPPGVCDHGTGDRRDPWYSTVGLLPPVRAMSQRNLNAKTEQGPTGVTMTSNPITWGQ  
IKKTTQEA EKLLERQQA KTPDSMFLAMLAVVSCASIGSGEPPTGN  
>19q13.43b\_chr19:58817037-58826633  
QEMDKPCGCPPGVCDHGTGDRRDPWYSTVGLLPPVRAMSQRNLNAKTEQGPTGVTMTSNPITWGQ  
IKKTTQEA EKLLERQQA KTPDSMFLAMLAVVSCAVCFPCVEAKTY  
>16p11.2\_chr16:30627018-30635602  
QEMDKPCGCPGVCDHGMGDWRDLWIPTMRVPPV\*AMSQWNLNAKTEWGPTGVTMTSTPITW  
GQIKKTTQEA EKLLERQQA KTPDSMFMAMLAVISCEVCFPCAEAKTY  
>16p11.1\_chr16:34750975-34758850  
QEMDKPCECPQVCDHGMGDWRDWTWPTTGPAPPV\*AMSQLNLNVKME\*RPTRVTLTSTLITWGQ  
IKKTTPEAEKLV\*CQQA KTPDSMFMAMLAVISCAV\*FFCAEAKTY  
>6p22.2\_chr6:26288250-26296494\_  
QEMDKLCRCPPGTCNHGTGDRDPWIATMGPVPPVQAIGQLNLNAKMEQGPTGVTLTSTLITWGQ  
IKKTMQEA EKMLECQQA KTPESMFLAILAVVSCVCFPCVEAKTC  
>4q13.2\_chr4:69610304-69616956\_  
QDMDKLCGFPHVCDHGMGDWRDPWIPTMGPAPPI\*AMSQLNLNAKTWGQIKKTTQKA EKLEH  
QGEAKTPNSKFMAMSAVISCACVCFPCAEAKTY  
>1q25.2\_chr1:179406261-179412404\_  
QEMEKPCGCPQACGHGMGDWRNPGWPTMGPVPPVRAMSQSLSAKTERRLTRVTMTSTLITWG  
QLKKTMQEA EKLEHQQQAKTPDSIFLAMLAIMSCAVCFPCAEAKTY  
>6p21.32b\_chr6:32527497-32535122\_  
QEMDKPCGCPQGACNHGTGDRNPGWPTMGPVPPVRAMSQSLSEKMERRTIRVMAISNLINCGQ  
LRKTMQEA EKLEHQQQAKTPDSMFLAKIPIMSCAVCFPCAEAKIY  
>8q11.1\_chr8:47395171-47403000\_  
QEMDKPCGCPQGVCDHGMGD\*RNPGWPTMGPVPPACAVSLSLSAKTKRRTSKVMMTPTPIT\*GQ  
LKKTQEA EKLEFQQTTPDSMFMAMLTIMSCAVCFPCAEAKTY  
>14q12\_chr14:28879914-28890437  
QEMDKLCGCCQGVCDQGMGD\*RNPGWPTMGPVPPVQAMSLSLSAKTERRPTKVMTTSTPITWGQ  
LKKTQEA EKLEHQQQTTPDSIFMAMLAIMFCVCFPCAEAKTY  
>3p21.31a\_chr3:46087646-46095966\_  
QEMDKPCGCPQGACDHIMGD\*RNPGWPTMGPVPPVRAMSQSLSAKRERRPTRITMTSTPVTWGQ  
LKKATQETEKLLECQQA KTPDSMFLAMLAIMSCAVCFPVQKQKH  
>12q24.12\_chr12:112253979-112263658\_  
WEMDKPCGCPQGACDHGTGD\*RNPGWPTMGLVPLV\*AMSQLSQSAKMERRPTGVMTTSTPITWG  
QLKNTTQEA GKLEHQSQA KHPDSMFLAMLAIMSCVCFPCAEAKTF  
>20p11.21\_chr20:25374769-25383907\_  
QEMDKLCGCPQGARDHGIGDWRNPGWPTMGPAPPVIRAMSQSLSLTPKMERRPSRVMMTSIPTTWG  
ELKKTWWEA EKLEHQ\*QA KTPDSMFLAMLAIVSHVCFRCAEAKT  
>10q11.21\_chr10:45774424-45782353  
QEMDKPCGCPQGACDHGTGDRDPW\*PTMGLVPPVQAMSLSLSAKTERRPAGVMTTSSPITWGQ  
LKKTMQEGETLLDCHDEAKTPDSMFLAILAIMPCVVYFPCSEAKT  
>19p13.2a\_chr19:9618707-9625736\_  
QEMDKPFGCPQGACNHGTGDRDPWRPTMGLVPPVWAMSLSLSVKMEKRLTGVTRTSNPIT\*G  
QLKKTQEA EKMLERQQA KTPESMFLAMLAIMSCVCFLSAEAKTY

>19p13.2b\_chr19:11964097-11971799\_  
QEMDTPCECPQGACHHGTGNWRDPWWPTMGLVPPVQPMSQLSLSVKTERRLTGVTSTSTPITWG  
QLKKTMQEAEKLLERQGQAKTPDAMFLACQP\*CPVQYVFPVQR\*KH  
>19q13.43a\_chr19:58023984-58029856  
QEMDNPCGCPQGVCDHGTGDWRNPWISTVGPAPPVRAMS\*LNLNAKTEQGPTGVTLTSTPIKWGQ  
LKKTQAEAKLLEQNP\*LHVYGHASCNLCGMFSLCRGKNL  
>10q25.1\_chr10:43796372-43788582  
QEMNKPCGCRQDVCNHGKGDWRDPWIPTTGLVPPV\*AMSQLNLNAKTERGPTRVTLTPPVTWG  
QIKKTTQAEKLLLECQGFSLC  
>10q11.21\_chr10:110488980-110492726  
QKMDKPCRCPQEVNMGMDWWDWIPITGLVPLV\*AMSQLNPNEKTERGPTEIMLTSTPIIRGQI  
KKTQAEAKLMERQSFTFC  
>19p12d\_chr19:24047631-24054030  
QQMDKPCGCPQGACNMGMDWRNPWWPTMGPVPLVWAMSQLSLSAKMDRRPTGVMVTSTPIT  
WGTLKKTMQEAEKLLERQGQKKPLIPCSWPC\*L\*CPVW\*VFPCRVKNI  
>19q13.41e\_chr19:53487788-53492829\_  
QEMDKPCGCPPGVCHEMGD\*QDPRWPTVDLVPPVGVVSQLNLNAKMEQGPTGVTLTSTPITWGQ  
IKKTKQAEAKMLEHPCAWPC\*Q\*CPVRYVSPV\*RPKH  
>Xp11.21\_chrX:57129414-57135829  
QEIDKPCGCPQGGCSRGMGDWRNPGWPTMGPVPLV\*AMSQLSLSKTERLTSVMTTSTPITWGQLK  
KTMQAEAKLLEHQGQTKTRFHVCDHVSLNVLCGIFSLCKGKNI  
>4q21.1\_chr4:78313436-78321358\_  
QETNKLYGCEGACNMGMDWRNTWLQNMGPVPLV\*AMSQLSLSAKMERWLTRVTMTSTPITGG  
NSRKPHRKLKLENYGSIKARQKPLIPCSWLC\*P\*CPVWYVFPVQKQKH
